# Supplementary material for: Experimental Evidence on Iterated Reasoning in Games
Source: PLOS journal article supplement (doi:10.1371/journal.pone.0136524), 2015-08-27
Supplement: S2 (10.1371/journal.pone.0136524.s002) [file journal.pone.0136524.s002]

## S2 Appendix

In the appendix we provide the extended descriptions of the hit game and the dirty faces game, identify their solutions, and provide intuition why these solutions should obtain.

### Hit game

A hit game is defined by a tuple  $(m, a, b)$  with  $m, a, b \in \mathbb{N} \setminus \{0\}$  and  $1 \leq a < b$ . Two players alternately pick an integer from the interval  $[a, b]$ . These numbers are added up. The player who reaches  $m$  or surpasses it wins the game. Note, that each game  $(m, a, b)$  with any history and the current sum  $d$  is equivalent to a game  $(m', a, b)$  with  $m' = m - d$ . In other words, each current game can be reduced to a ‘smaller’ game in which the player having the move is the new starting player and the current sum  $d$  is set back to 0. Hence, it is sufficient to analyze only the first choice of the starting player for all possible games  $(m, a, b)$  in order to analyze all possible games and game histories.

We state that that the starting player is in a winning position if

$$m \in W := \bigcup_{k \in \mathbb{N}} [1 + k(a + b); b + k(a + b)]$$

and in a losing position if

$$m \in L := \bigcup_{k \in \mathbb{N}} [b + 1 + k(a + b); (k + 1)(a + b)].$$

Note that winning and losing positions are mutually exclusive, i.e.  $W \cap L = \emptyset$ , and well defined over  $\mathbb{N}$ , i.e.  $\forall m \in \mathbb{N} \setminus \{0\} : m \in W \vee m \in L$ . Hence for each value of  $m$  the player is either in a winning or in a losing position.

In a subgame perfect equilibrium the player in a winning position can certainly achieve a victory by consistently forcing her opponent into a losing position, unless a direct win is possible. The player in the losing position is incapable of influencing this outcome. Our proof is three-folded: First, confirm that a direct win is only possible in a winning position with  $k = 0$ . This is true because it is the only position from which the game can be won immediately by picking  $b$  (because of  $m \leq b$ ). In any other position we have  $m > b$  and a direct win is therefore impossible. Second, we prove that in a losing position the next

player will be in a winning position regardless of the number the current player is picking. To see this, let  $x$  be the number the player picks and  $m'$  be the by  $x$  reduced game for the next player. We can redefine  $m$  in a losing position as  $m = b + 1 + k(a + b) + y$  with  $k \in \mathbb{N}$  and  $\mathbb{N} \ni y \in [0, a - 1]$ . If we take into account that  $(y - x) \in [-b; -1]$  we see that the reduced game

$$m' = m - x = b + 1 + k(a + b) + y - x \in [1 + k(a + b), b + k(a + b)] \subseteq W$$

must be a winning position.

Finally, we show that in any winning position with  $k > 0$  the player can force the other player into a losing position by picking the number  $\max\{a, m \bmod (a + b)\}$ . To see this, let  $m'$  be the reduced game for the next player. If we redefine  $m$  in a winning position as  $m = 1 + k(a + b) + z$  with  $k \in \mathbb{N}$  and  $\mathbb{N} \ni z \in [0, b - 1]$  we have

$$\begin{aligned} m' &= m - \max\{a, m \bmod (a + b)\} \\ &= 1 + k(a + b) + z - \max\{a, (1 + k(a + b) + z) \bmod (a + b)\} \\ &= 1 + k(a + b) + z - \max\{a, 1 + z\}. \end{aligned}$$

In the case of  $a \geq 1 + z \Leftrightarrow z < a$  we see that the reduced game

$$m' = 1 + k(a + b) + z - a = b + 1 + k'(a + b) + z \in L, \quad k' \in \mathbb{N}$$

is a losing position. In the case of  $a < 1 + z \Leftrightarrow z > a$  we have

$$m' = 1 + k(a + b) + z - (1 + z) = (k' + 1)(a + b) \in L, \quad k' \in \mathbb{N},$$

which is also a losing position.  $\square$

## Dirty Faces Game

In a dirty faces game each player  $i \in N = \{1, 2, \dots, n\}$  is assigned a type  $\tau_i \in \{X, O\}$ . Each player knows the types of all others but not her own. However, it is publicly announced that at least one player is an X-type. The game then proceeds in turns, with players privately choosing one of the three possible announcements ‘I am an X-type’ ( $X$ ), ‘I am an O-type’ ( $O$ ), or ‘I don’t know

my type' ( $U$ ). When everyone has chosen an announcement, these are made public and a new turn begins. The game ends for a player by either announcing a certain type ( $X$  or  $O$ ) or at the end of turn  $T \geq n$ . The incentives are designed in such a way that the players have an interest in logically deducing their own type and publicly announcing it as quickly as possible. In addition if a player isn't capable of deducing her type yet she will announce  $U$  instead (see section 3.3 for details).

Following common practice in the experimental literature on the dirty faces game (Weber 2001; Bayer & Chan 2007), we abstain from a complete analysis of this game and instead focus on the underlying intuition in terms of interactive knowledge. Let  $k \in \mathbb{N}$  with  $k \leq n$  be the number of  $X$ -types in the game and  $k_i \in \mathbb{N}$  the number of  $X$ -types a player  $i$  observes. Note that a player  $i$  observing  $k_i$   $X$ -types knows that the true value of  $k$  must be either  $k_i$  (if  $\tau_i = O$ ) or  $k_i + 1$  (if  $\tau_i = X$ ). Second, note the dual function of the public announcement: Besides providing each player with the private information that there is at least one  $X$ -type ( $k \geq 1$ ) it makes this information common knowledge ( $CK(k \geq 1)$ ), i.e. everyone now knows this ( $\mathcal{K}^1(k \geq 1)$ ) and everyone knows that everyone knows this ( $\mathcal{K}^2(k \geq 1)$ ) and so on (until  $\mathcal{K}^\infty(k \geq 1)$ ). We will show by induction that if all players are rational and this is common knowledge in the dirty faces game each player  $i$  is able to deduce her type for any  $k_i \in \mathbb{N}$  with  $0 \leq k_i < n$ .

If  $k_i = 0$  it is clear that  $i$ , observing only  $O$ -types (and learning this way  $k \leq 1$ ), can immediately after the public announcement deduce that she has to be an  $X$ -type, which leads her to announce  $X$  in the first turn. In the case of  $k_i = 1$  the only thing new  $i$  derives from the public announcement is  $CK(k \geq 1)$ . Therefore,  $i$  is not able to deduce her type in turn 1 and will announce  $U$ . At the beginning of the new turn, however,  $i$  can see the announcement of the observed  $X$ -type  $j$ . If  $j$  has announced  $X$  in turn 1, he could do so only if  $k_j = 0$  and if  $j$  knows that  $k \geq 1$  (and  $i$  knows that  $j$  knows that because of  $CK(k \geq 1)$ ), hence  $j$  must be the only  $X$ -type in the game and  $k = k_i \Leftrightarrow \tau_i = O$ , therefore  $i$  announces  $O$  in turn 2. If, instead,  $j$  has announced  $U$ ,  $i$  notices that  $j$  did not announce  $X$  in turn 1, hence this could only mean that  $k_j > 0$  which implies that  $k \geq 2 \Leftrightarrow \tau_i = X$ . Note that we do not have to discuss the case that an  $X$ -type announces  $O$ , simply because this would contradict the rationality assumption. Also take into account that (at least for  $k_i \leq 1$  it was the case that) a player  $i$  can infer her type exactly in turn  $t = k_i + 1$ .

Finally, let  $d \in \mathbb{N}$  be the number for which we have shown that each player  $j$  observing  $k_j \leq d$  can deduce his type at turn  $t = k_j + 1$ . We will show that

a player  $i$  observing  $k_i = d + 1$  can deduce her type in turn  $t = k_i + 1$ . In the case of  $\tau_i = O$  the X-types, player  $i$  observes, observe only  $d$  other X-types, hence (using the induction basis) they can deduce their types in turn  $d + 1$  and will simultaneously announce  $X$  in the respective turn. Player  $i$  observing their announcement in turn  $d + 2$  knows thanks to  $CK(k \geq 1)$  on which basis they are acting and can therefore infer that  $k = k_i \Leftrightarrow \tau_i = O$ . In the case of  $\tau_i = X$  the observed X-types observe  $d + 1$  other X-types, hence they will announce  $U$  in turn  $d + 1$ . Player  $i$ , noticing in turn  $d + 2$  that the observed X-types did not announce  $X$ , and can therefore infer that  $k > k_i \Leftrightarrow \tau_i = X$ .  $\square$

In the equilibrium we observe that until turn  $k - 1$  all player announce  $U$ . At the beginning of each turn  $t$  it becomes common knowledge that  $k \geq t$  (because otherwise the X-types would have had announced  $X$  already). In turn  $k$  all X-types learn that  $k > k_i \Leftrightarrow \tau_i = X$  and simultaneously announce  $X$ , while the O-types continue in announcing  $U$ . In turn  $k + 1$  the O-types learn  $k = k_i \Leftrightarrow \tau_i = O$  and simultaneously announce  $O$ .
